# Supplementary material for: Frequency of cefiderocol heteroresistance among patients treated with cefiderocol for carbapenem-resistant Acinetobacter baumannii infections
Source: PubMed Central journal article supplement (PMC11382143; doi:10.1093/jacamr/dlae146), 2024-09-09
Supplement: dlae146_supplementary_data.pdf [file dlae146_supplementary_data.pdf]

**Supplementary Figure 1.** Heteroresistance identified by cefiderocol disk diffusion testing of carbapenem-resistant *Acinetobacter baumannii* clinical isolates.

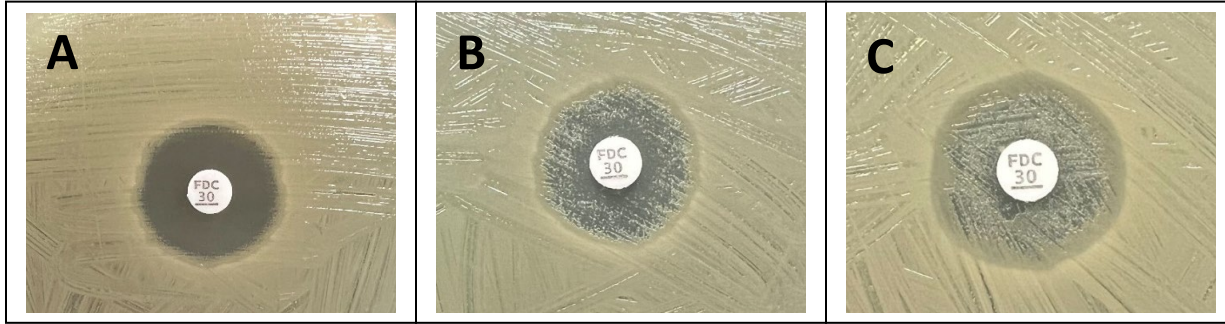

**Note.** Panel A demonstrates an isolate classified as susceptible by disk diffusion testing. Panels B and C demonstrate isolates classified as heteroresistant based on the presence of colonies within the zone of inhibition.

**Supplementary Figure 2.** Mean survival values for each isolate across doubling dilutions of cefiderocol distinguished by classification as heteroresistant or susceptible

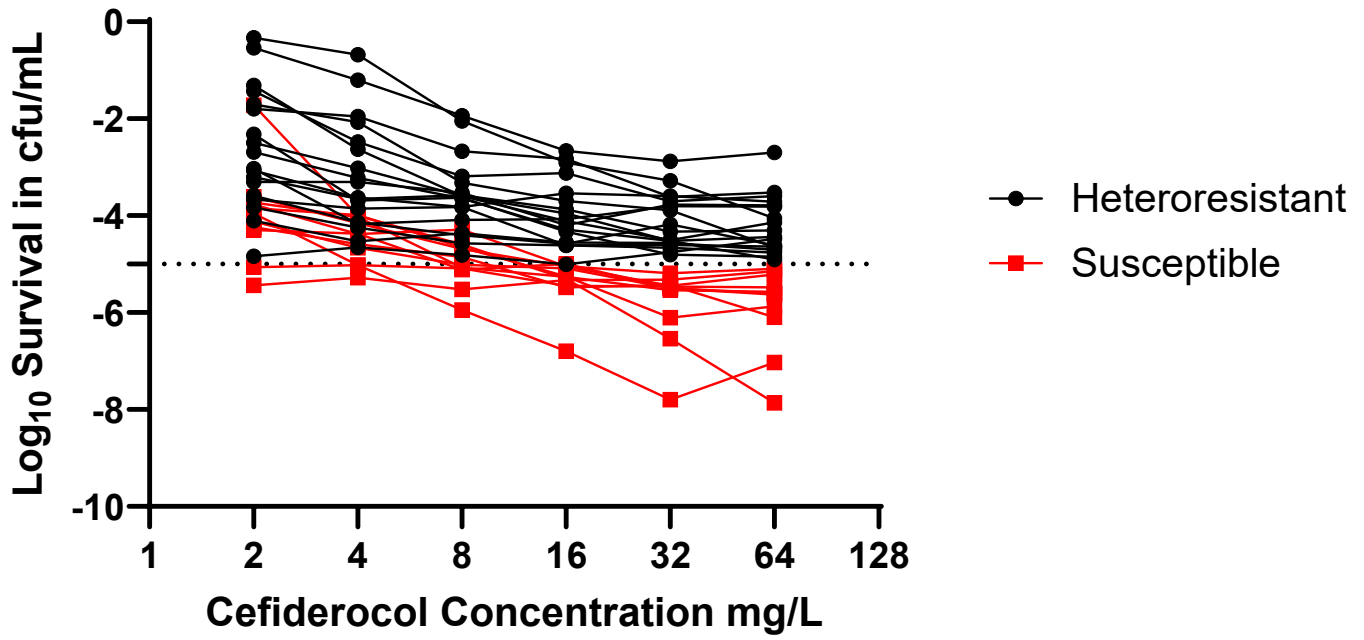

**Note.** Horizontal dotted line at  $-5\log_{10}$  signifies the predefined break between heteroresistant and susceptible ( $<0.001\%$  of isolates growing at 32mg/L, equivalent to  $-5\log_{10}$ ).

**Supplementary Figure 3.** Distribution of isolates by cefiderocol MICs by PAP susceptibility classification.

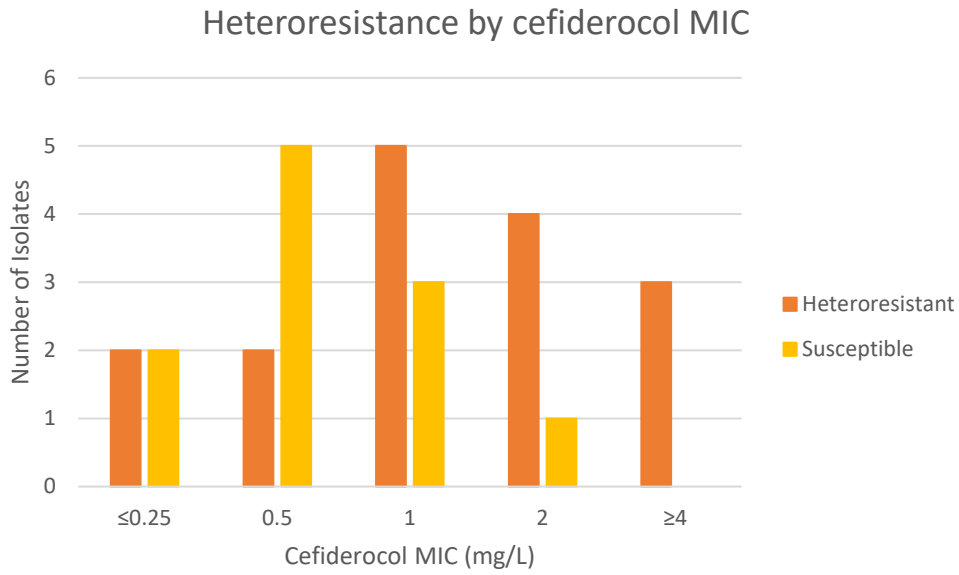

Abbreviations: MIC = minimum inhibitory concentration; PAP = population analysis profile

**Supplementary Figure 4.** Distribution of patients experiencing clinical success or failure separated by baseline isolate cefiderocol MIC.

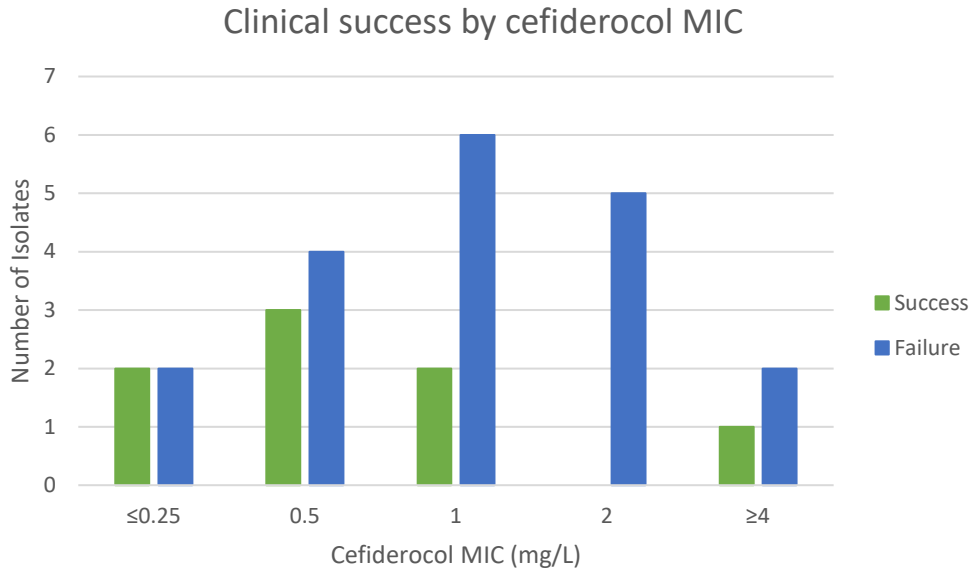

Abbreviation: MIC = minimum inhibitory concentration

**Supplementary Table 1.** Summary of PAP results for each baseline isolate.

| Patient  | Isolate | FDC MIC (µg/mL) | HR classification | Mean log-kill at 32µg/mL | % reduction <sup>1</sup> | Mean log-kill at 64µg/mL | % reduction <sup>1</sup> | AUC   |
|----------|---------|-----------------|-------------------|--------------------------|--------------------------|--------------------------|--------------------------|-------|
| Italy-3  | E0420   | 1               | HR                | -2.85                    | 0.1650%                  | -2.69                    | 0.2846%                  | 351.5 |
| Italy-6  | E0424   | 8               | HR                | -3.62                    | 0.0355%                  | -3.52                    | 0.0520%                  | 309.5 |
| Italy-2  | E0418   | 1               | HR                | -3.70                    | 0.0394%                  | -3.60                    | 0.0727%                  | 298.7 |
| Italy-11 | E0432   | 4               | HR                | -3.59                    | 0.0269%                  | -3.71                    | 0.0200%                  | 284   |
| Italy-7  | E0425   | 2               | HR                | -3.77                    | 0.0183%                  | -3.79                    | 0.0200%                  | 272.9 |
| Italy-8  | E0427   | 1               | HR                | -3.81                    | 0.0185%                  | -3.81                    | 0.0218%                  | 267.7 |
| Italy-5  | E0423   | 0.5             | HR                | -4.51                    | 0.0044%                  | -4.14                    | 0.0239%                  | 252.7 |
| Pitt-5   | AB648   | 2               | HR                | -4.33                    | 0.0049%                  | -4.30                    | 0.0053%                  | 253.9 |
| Pitt-4   | AB589   | 1               | HR                | -4.52                    | 0.0051%                  | -4.44                    | 0.0053%                  | 244.1 |
| Pitt-1   | AB526   | 0.25            | HR                | -4.76                    | 0.0019%                  | -4.48                    | 0.0040%                  | 213.5 |
| Italy-9  | E0428   | 0.5             | HR                | -4.18                    | 0.0067%                  | -4.61                    | 0.0038%                  | 236.8 |
| Pitt-2   | AB555   | 2               | HR                | -4.60                    | 0.0028%                  | -4.64                    | 0.0023%                  | 230.2 |
| Italy-1  | E0396   | 4               | HR                | -3.88                    | 0.0140%                  | -4.66                    | 0.0030%                  | 270.4 |
| Pitt-3   | AB574   | 0.25            | HR                | -4.56                    | 0.0032%                  | -4.70                    | 0.0022%                  | 224.7 |
| Italy-10 | E0431   | 2               | HR                | -4.66                    | 0.0030%                  | -4.76                    | 0.0028%                  | 220.8 |
| Italy-4  | E0422   | 1               | HR                | -4.80                    | 0.0016%                  | -4.84                    | 0.0017%                  | 229.8 |
| Pitt-7   | AB545   | 1               | S                 | -5.19                    | 0.0008%                  | -5.09                    | 0.0010%                  | 197.7 |
| Pitt-13  | E0368   | 0.12            | S                 | -5.32                    | 0.0005%                  | -5.15                    | 0.0008%                  | 178.2 |
| Pitt-8   | AB570   | 1               | S                 | -5.44                    | 0.0004%                  | -5.22                    | 0.0007%                  | 190.9 |
| Pitt-10  | AB603   | 0.5             | S                 | -5.47                    | 0.0004%                  | -5.48                    | 0.0003%                  | 174.4 |
| Pitt-12  | AB616   | 0.5             | S                 | -5.54                    | 0.0004%                  | -5.57                    | 0.0004%                  | 176.8 |
| Pitt-11  | AB605   | 0.5             | S                 | -5.50                    | 0.0006%                  | -5.60                    | 0.0005%                  | 178.1 |
| Italy-13 | E0429   | 0.5             | S                 | -5.50                    | 0.0004%                  | -5.63                    | 0.0003%                  | 176.7 |
| Italy-14 | E0430   | 0.25            | S                 | -6.11                    | 0.0003%                  | -5.87                    | 0.0002%                  | 161   |
| Italy-12 | E0421   | 0.5             | S                 | -5.42                    | 0.0006%                  | -6.09                    | 0.0001%                  | 167.1 |
| Pitt-6   | AB536   | 1               | S                 | -7.79                    | 0.0000%                  | -7.03                    | 0.0001%                  | 70    |
| Pitt-9   | AB586   | 2               | S                 | -6.54                    | 0.0002%                  | -7.87                    | 0.0000%                  | 122.5 |

Abbreviations: AUC = area under the curve; FDC = cefiderocol; HR = heteroresistant; S = susceptible

<sup>1</sup>The percent reduction was calculated as the ratio of colonies growing on drug-free agar relative to cefiderocol-containing agar.

**Supplementary Table 2.** Molecular characteristics of isolates classified as cefiderocol-heteroresistant and susceptible.

| Patient  | Isolate | HR by PAP | FDC MIC (mg/L) | Oxford ST | Acquired <i>bla</i> <sub>OXA</sub> | Intrinsic <i>bla</i> <sub>OXA</sub> | <i>bla</i> <sub>ADC</sub> | PBP3  | <i>piuA</i>  | <i>pirA</i> | Other antibiotic resistance genes detected                                                                                                                                                                            |
|----------|---------|-----------|----------------|-----------|------------------------------------|-------------------------------------|---------------------------|-------|--------------|-------------|-----------------------------------------------------------------------------------------------------------------------------------------------------------------------------------------------------------------------|
| Italy-4  | E0422   | HR        | 1              | 195       | OXA-23                             | OXA-66                              | ADC-73                    | A515V | Intact       | Intact      | <i>strA, strB, aphA1, armA, bla</i> <sub>TEM-1D</sub> , <i>mph(E), msr(E), sul2, tet(B)</i>                                                                                                                           |
| Italy-5  | E0423   | HR        | 0.5            | 195       | OXA-23                             | OXA-66                              | ADC-73                    | A515V | Intact       | Intact      | <i>strA, strB, aphA1, armA, bla</i> <sub>TEM-1D</sub> , <i>mph(E), msr(E), sul2, tet(B)</i>                                                                                                                           |
| Italy-8  | E0427   | HR        | 1              | 195       | OXA-23                             | OXA-66                              | ADC-73                    | A515V | Intact       | Intact      | <i>strA, strB, aphA1, armA, bla</i> <sub>TEM-1D</sub> , <i>mph(E), msr(E), sul2, tet(B)</i>                                                                                                                           |
| Italy-9  | E0428   | HR        | 0.5            | 195       | OXA-23                             | OXA-66                              | ADC-73                    | A515V | Intact       | Intact      | <i>strA, strB, aphA1, armA, bla</i> <sub>TEM-1D</sub> , <i>mph(E), msr(E), sul2, tet(B)</i>                                                                                                                           |
| Pitt-1   | AB526   | HR        | 0.25           | 208       | OXA-23                             | OXA-80                              | ADC-30                    | WT    | Intact       | Intact      | <i>strA, strB, bla</i> <sub>TEM-1D</sub> , <i>sul2, tet(B)</i>                                                                                                                                                        |
| Pitt-3   | AB574   | HR        | 0.25           | 208       | OXA-23                             | OXA-80                              | ADC-30                    | WT    | Intact       | Intact      | <i>strA, strB, aphA1, bla</i> <sub>TEM-1D</sub> , <i>catB8, sul2, tet(B)</i>                                                                                                                                          |
| Italy-1  | E0396   | HR        | 4              | 281       | Disrupted                          | OXA-66                              | ADC-30                    | K235N | T385N; D386* | Intact      | <i>aadA1, strA, strB, aphA1, armA, catB8, mph(E), msr(E), sul1, tet(B)</i>                                                                                                                                            |
| Italy-6  | E0424   | HR        | 8              | 281       | OXA-23 (P225T)                     | OXA-66                              | ADC-30                    | K235N | T385N; D386* | Intact      | <i>aadA1, strA, strB, aphA1, armA, catB8, mph(E), msr(E), sul1, tet(B)</i>                                                                                                                                            |
| Italy-7  | E0425   | HR        | 2              | 281       | OXA-23                             | OXA-66                              | ADC-30                    | K235N | T385N; D386* | Intact      | <i>aadA1, strA, strB, aphA1, armA, catB8, mph(E), msr(E), sul1, tet(B)</i>                                                                                                                                            |
| Italy-10 | E0431   | HR        | 2              | 281       | OXA-23                             | OXA-66                              | ADC-30                    | K235N | T385N; D386* | Intact      | <i>aadA1, strA, strB, aphA1, armA, catB8, mph(E), msr(E), sul1, tet(B)</i>                                                                                                                                            |
| Italy-11 | E0432   | HR        | 4              | 281       | OXA-23                             | OXA-82                              | ADC-33                    | WT    | Intact       | Intact      | <i>aphA6, sul1, aadA2, aadB</i>                                                                                                                                                                                       |
| Italy-2  | E0418   | HR        | 1              | 369       | OXA-23                             | OXA-66                              | ADC-73                    | N392T | Q217*        | Intact      | <i>aadA1, strA, strB, aphA1, armA, catB8, mph(E), msr(E), sul1, tet(B)</i>                                                                                                                                            |
| Italy-3  | E0420   | HR        | 1              | 369       | OXA-23                             | OXA-66                              | ADC-73                    | N392T | Q217*        | Intact      | <i>aadA1, strA, strB, aphA1, armA, catB8, mph(E), msr(E), sul1, tet(B)</i>                                                                                                                                            |
| Pitt-2   | AB555   | HR        | 2              | 451       | OXA-23                             | OXA-66 (delA at 325, fs)            | ADC-56                    | T526S | Intact       | Intact      | <i>aadA1, strA, strB, armA, catB8, mph(E), msr(E), sul1, sul2, tet(B)</i>                                                                                                                                             |
| Pitt-5   | AB648   | HR        | 2              | 451       | OXA-23                             | OXA-66 (delA at 325, fs)            | ADC-73 (R148Q)            | WT    | Intact       | Intact      | <i>strA, aphA1, strB, mph(E), msr(E), sul2, tet(B)</i>                                                                                                                                                                |
| Pitt-4   | AB589   | HR        | 1              | new ST    | Missing                            | OXA-113                             | ADC-30                    | WT    | Intact       | Intact      | <i>strA, strB, mph(E), msr(E), tet(B)</i>                                                                                                                                                                             |
| Italy-12 | E0421   | S         | 0.5            | 195       | OXA-23                             | OXA-66                              | ADC-73                    | A515V | Intact       | Intact      | <i>strA, strB, aphA1, armA, bla</i> <sub>TEM-1D</sub> , <i>mph(E), msr(E), sul2, tet(B)</i><br><i>aadA1, strA, aphA1, aphA6, strB, armA, bla</i> <sub>TEM-1D</sub> , <i>catB8, mph(E), msr(E), sul1, sul2, tet(B)</i> |
| Pitt-8   | AB570   | S         | 1              | 208       | OXA-23                             | OXA-66                              | ADC-162                   | WT    | Intact       | Y650*       | <i>strA, strB, aphA6, bla</i> <sub>TEM-1D</sub> , <i>sul2, tet(B)</i>                                                                                                                                                 |
| Pitt-13  | E0368   | S         | 0.12           | 208       | OXA-23                             | OXA-80                              | ADC-30                    | WT    | Intact       | Intact      | <i>strA, strB, aphA6, bla</i> <sub>TEM-1D</sub> , <i>sul2, tet(B)</i>                                                                                                                                                 |
| Pitt-7   | AB545   | S         | 1              | 281       | OXA-23                             | OXA-82                              | ADC-33                    | WT    | Intact       | Intact      | None found                                                                                                                                                                                                            |
| Italy-13 | E0429   | S         | 0.5            | 369       | OXA-23                             | OXA-66                              | ADC-73                    | N392T | Intact       | Intact      | <i>aadA1, strA, strB, armA, catB8, mph(E), msr(E), sul1, tet(B)</i>                                                                                                                                                   |
| Pitt-6   | AB536   | S         | 1              | 451       | OXA-23                             | OXA-66 (delA at 325, fs)            | ADC-30                    | N392T | Intact       | Intact      | <i>strA, strB, armA, mph(E), msr(E), sul1, sul2, arr-2, cmlA1</i>                                                                                                                                                     |
| Pitt-9   | AB586   | S         | 2              | 451       | OXA-23                             | OXA-66 (delA at 325, fs)            | ADC-56                    | WT    | Intact       | Intact      | <i>strA, strB, armA, mph(E), msr(E), sul2, tet(B)</i>                                                                                                                                                                 |
| Pitt-10  | AB603   | S         | 0.5            | 451       | OXA-23                             | OXA-66                              | ADC-73                    | A515V | Intact       | Intact      | <i>strA, strB, aphA1, armA, bla</i> <sub>TEM-1D</sub> , <i>mph(E), msr(E), tet(B)</i>                                                                                                                                 |
| Pitt-11  | AB605   | S         | 0.5            | 451       | OXA-23                             | OXA-66                              | ADC-73                    | A515V | Intact       | Intact      | <i>strA, strB, aphA1, armA, bla</i> <sub>TEM-1D</sub> , <i>mph(E), msr(E), tet(B)</i>                                                                                                                                 |
| Pitt-12  | AB616   | S         | 0.5            | 451       | OXA-23                             | OXA-66                              | ADC-73                    | A515V | Intact       | Intact      | <i>strA, strB, aphA1, armA, bla</i> <sub>TEM-1D</sub> , <i>mph(E), msr(E), tet(B)</i>                                                                                                                                 |
| Italy-14 | E0430   | S         | 0.25           | new ST    | OXA-72                             | OXA-66                              | ADC-30                    | WT    | Intact       | Intact      | <i>strA, strB, armA, mph(E), msr(E), sul1, sul2, tet(B), aac(6')-1p</i>                                                                                                                                               |

Note. All isolates were classified as Pasteur sequence type 2

\* stop codon

Abbreviations: FDC = Cefiderocol; FS = frameshift; HR = heteroresistant; MIC = minimum inhibitory concentration; PAP = population analysis profile; S = susceptible; ST = sequence type; WT = wild-type
